# Supplementary material for: Influence of hydroquinone content on thermotropic liquid crystalline copolymers and nanocomposites: thermo-mechanical properties and morphology
Source: Royal Society of Chemistry journal article supplement (doi:10.1039/d2ra00795a), 2022-01-01
Supplement: d2ra00795a1.pdf [file d2ra00795a1.pdf]

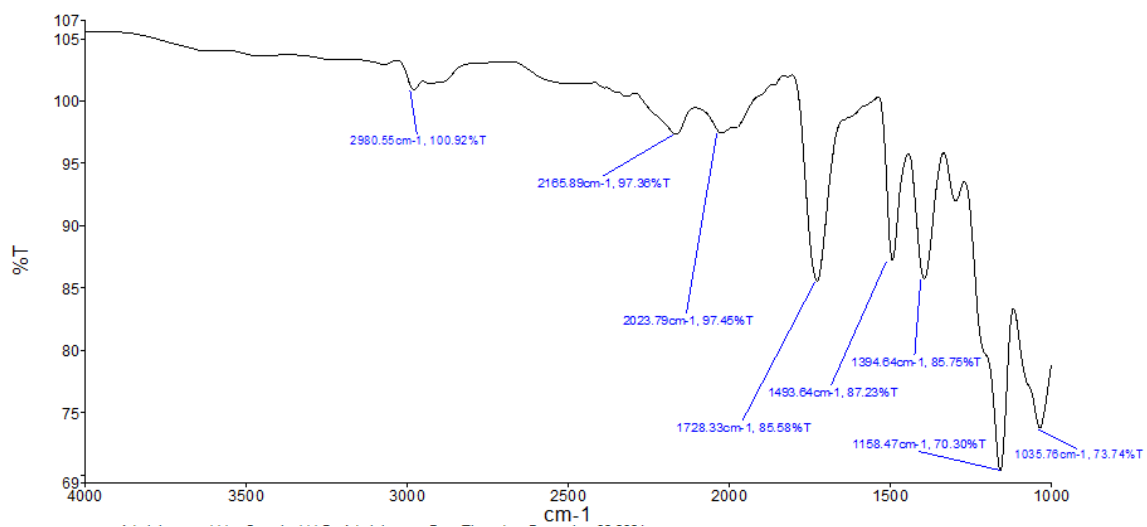

**Supplement-Figure 1.** FT-IR spectrum of TLCP at room temperature. In the chemical formula, x:y=1:1.

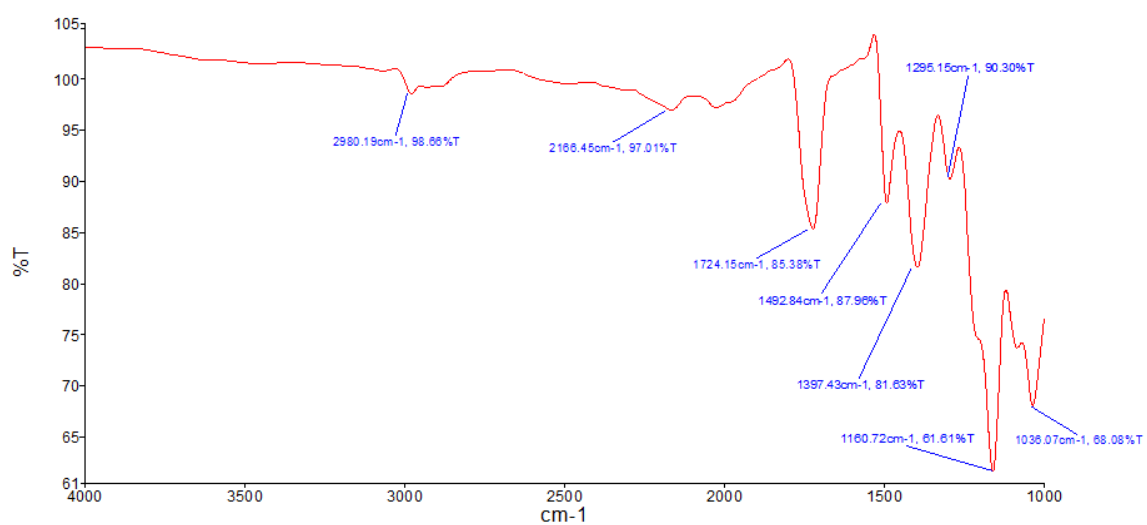

**Supplement-Figure 2.** FT-IR spectrum of TLCP at room temperature. In the chemical formula, x:y=1:4.

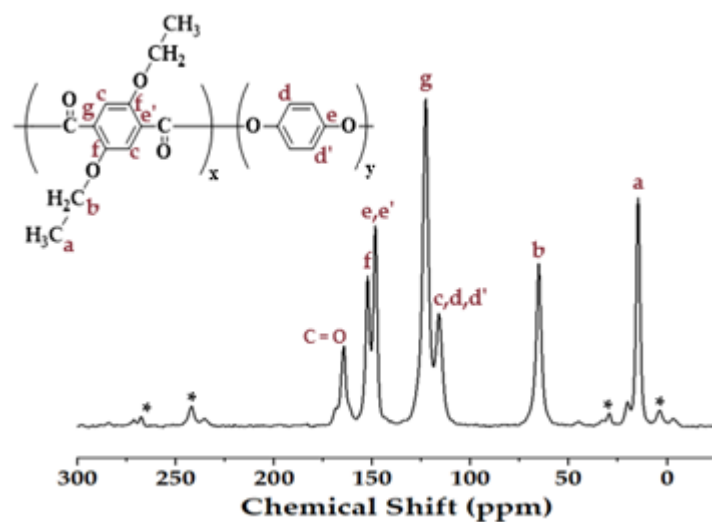

**Supplement-Figure 3.**  $^{13}\text{C}$ -NMR chemical shifts of TLCP at room temperature. In the chemical formula,  $x:y=1:1$ . The spinning sidebands are marked with asterisks.
